# Supplementary material
Source: PubMed Central journal article supplement (PMC2553122)

Table S1. pK<sub>a</sub> values of the charged residues on ferredoxin calculated by *H++*.

| Residue Name        | Complex 16                            |                                        |                  | Complex 42                            |                                        |                  |
|---------------------|---------------------------------------|----------------------------------------|------------------|---------------------------------------|----------------------------------------|------------------|
|                     | pK <sub>a</sub> on Reduced Ferredoxin | pK <sub>a</sub> on Oxidized Ferredoxin | ΔpK <sub>a</sub> | pK <sub>a</sub> on Reduced Ferredoxin | pK <sub>a</sub> on Oxidized Ferredoxin | ΔpK <sub>a</sub> |
| NTmet-1             | 7.810                                 | 7.797                                  | 0.013            | 7.343                                 | 7.324                                  | 0.019            |
| TYR-3               | 13.025                                | 12.992                                 | 0.033            | 12.931                                | 12.907                                 | 0.024            |
| LYS-4               | 11.158                                | 11.150                                 | 0.008            | 11.212                                | 11.202                                 | 0.010            |
| LYS-8               | 11.835                                | 11.803                                 | 0.032            | 12.454                                | 12.431                                 | 0.023            |
| ASP-13              | 1.833                                 | 1.815                                  | 0.018            | 1.320                                 | 1.303                                  | 0.017            |
| LYS-14              | 10.733                                | 10.719                                 | 0.014            | 10.308                                | 10.281                                 | 0.027            |
| GLU-17              | 4.217                                 | 4.211                                  | 0.006            | 4.304                                 | 4.296                                  | 0.008            |
| CYS-18 <sup>1</sup> | 18.830                                | 18.686                                 | 0.144            | 19.382                                | 19.066                                 | 0.316            |
| ASP-21              | 3.864                                 | 3.846                                  | 0.018            | 3.665                                 | 3.654                                  | 0.011            |
| TYR-23 <sup>2</sup> | 14.230                                | 14.005                                 | 0.225            | 14.696                                | 14.203                                 | 0.493            |
| ASP-26              | 1.831                                 | 1.393                                  | 0.438            | 2.831                                 | 2.195                                  | 0.636            |
| GLU-29 <sup>3</sup> | 6.133                                 | 5.787                                  | 0.346            | 1.156                                 | 0.877                                  | 0.279            |
| GLU-30              | 4.803                                 | 4.781                                  | 0.022            | 5.400                                 | 5.350                                  | 0.050            |
| ASP-34              | 4.041                                 | 4.035                                  | 0.006            | 4.132                                 | 4.072                                  | 0.060            |
| TYR-37 <sup>4</sup> | 13.751                                | 13.483                                 | 0.268            | 15.135                                | 14.770                                 | 0.365            |
| ARG-40 <sup>5</sup> | 19.015                                | 18.318                                 | 0.697            | 21.526                                | 20.918                                 | 0.608            |
| LYS-50              | 11.098                                | 11.026                                 | 0.072            | 10.666                                | 10.605                                 | 0.061            |
| ASP-57              | 4.409                                 | 4.337                                  | 0.072            | 4.730                                 | 4.659                                  | 0.071            |
| ASP-60              | 4.466                                 | 4.315                                  | 0.151            | 4.408                                 | 4.339                                  | 0.069            |
| ASP-65              | 4.235                                 | 4.200                                  | 0.035            | 4.402                                 | 4.343                                  | 0.059            |
| ASP-66              | 5.187                                 | 5.164                                  | 0.023            | 4.314                                 | 4.299                                  | 0.015            |
| TYR-80 <sup>6</sup> | 20.355                                | 20.237                                 | 0.118            | 13.095                                | 13.132                                 | -0.037           |
| ASP-84              | 3.504                                 | 3.489                                  | 0.015            | 3.089                                 | 3.070                                  | 0.019            |
| CYS-85 <sup>7</sup> | 17.860                                | 17.572                                 | 0.288            | 16.336                                | 16.076                                 | 0.260            |
| HIP-90 <sup>8</sup> | 3.955                                 | 3.353                                  | 0.602            | 6.387                                 | 6.285                                  | 0.102            |
| GLU-92              | 6.237                                 | 5.864                                  | 0.373            | 5.766                                 | 5.346                                  | 0.420            |
| GLU-93              | 4.351                                 | 4.331                                  | 0.020            | 4.259                                 | 4.238                                  | 0.021            |
| TYR-96              | 9.943                                 | 9.922                                  | 0.021            | 9.990                                 | 9.975                                  | 0.015            |
| CTyr-96             | 3.823                                 | 3.695                                  | 0.128            | 3.882                                 | 3.793                                  | 0.089            |

Notes:

1. Large pK<sub>a</sub> due to the proximity to the carbonyl O atoms of PRO-19 and THR-22.
2. Large pK<sub>a</sub> due to the proximity to the OH group of TYR-80.
3. The pK<sub>a</sub> of complex 42 is smaller compared to that of complex 16 due to the closer distance to ARG-40 in complex 42.
4. Large pK<sub>a</sub> due to the proximity to the GLU-29.
5. Large pK<sub>a</sub> due to the proximity to ASP-26 and GLU-29.
6. The larger pK<sub>a</sub> for complex 16 is caused by the closer distance to ASP-60 in complex 16.
7. Large pK<sub>a</sub> due to the proximity to the carbonyl O atom of SER-83.
8. The pK<sub>a</sub> of complex 16 is smaller than that of complex 42 because in complex 16 HIP-90 is buried inside protein, while in complex 42 it is on the surface.

Table S2. A sample APBS input file.

```
read
  mol pqr abc.pqr
end
elec
  mg-auto
  dime 161 161 161
  cglen 200.0 200.0 200.0
  fglen 160.0 160.0 160.0
  cgcent mol 1
  fgcent mol 1
  mol 1
  sdens 40
  npbe
  bcfl mdh
  ion 1 0.050 2.0
  ion -1 0.050 2.0
  pdie 4.0
  sdie 78.5
  srfm smol
  chgm spl2
  sradi 1.4
  swin 0.3
  temp 298.00
  gamma 0.105
  calcenergy total
  calcforce no
  write pot dx abc
end
quit
```

Figure S1. The spatial (A) and orientational occupancy landscapes (B) for BD16<sub>O</sub> at 50 mM ionic strength and a COM-COM distance of 36 Å. The color map in Fig. S1 –S5 is: blue-low and red-high.

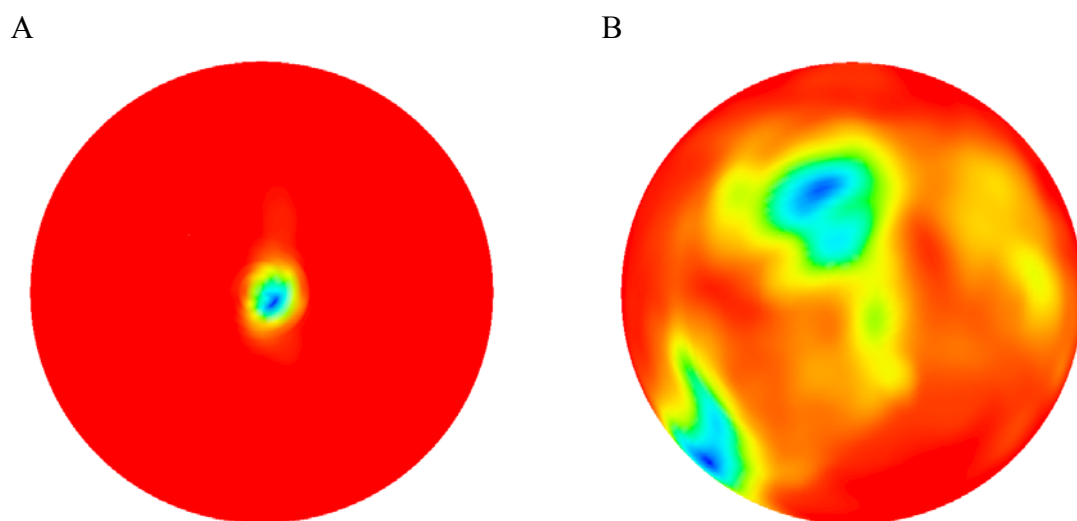

Figure S2. The spatial (A) and orientational occupancy landscapes (B) for BD42<sub>O</sub> at 50 mM ionic strength and a COM-COM distance of 40 Å.

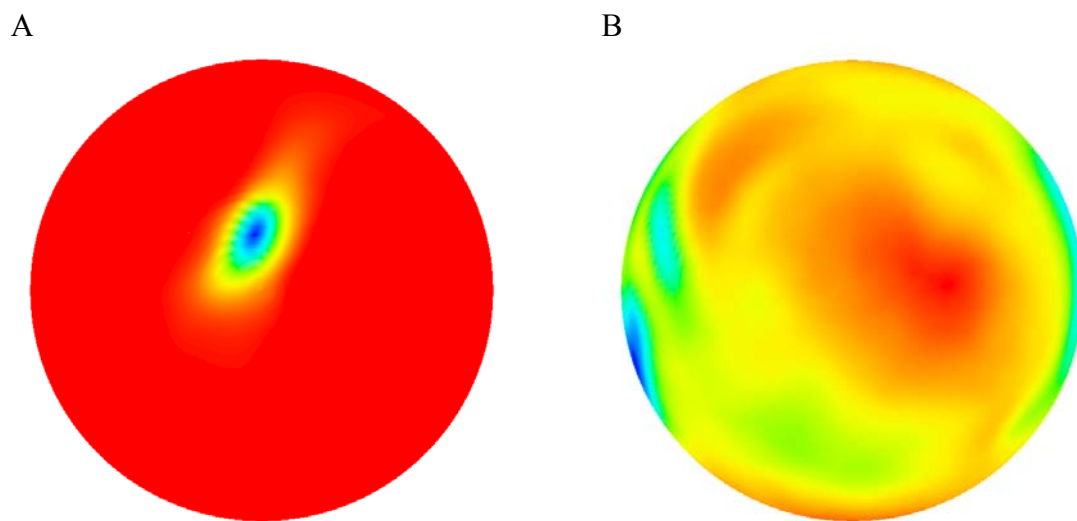

Figure S3. The configurations of EC42B<sub>R</sub> at 50 mM ionic strength (A) and at 150 mM ionic strength (B). The residue in purple is Asp5<sub>H</sub> and in green, Glu93<sub>F</sub>.

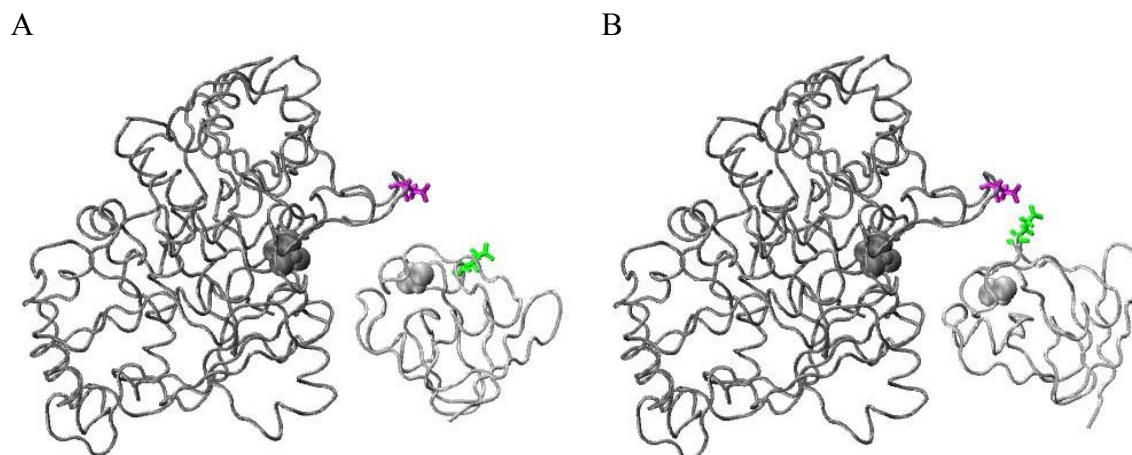

Figure S4. The free energy landscapes at 36 Å (A) and 40 Å (B) for BD16<sub>O</sub>.

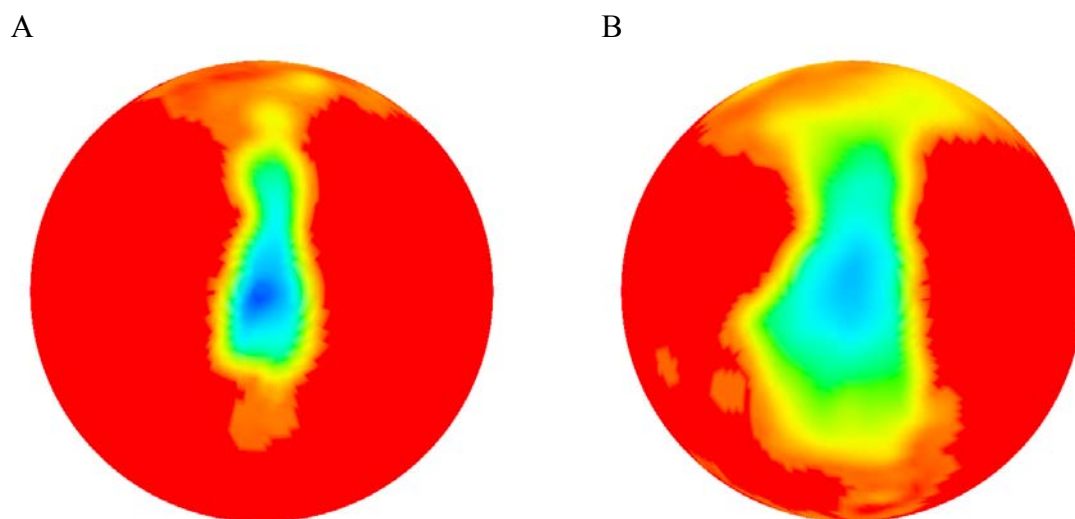

Figure S5. The free energy landscapes at 36 Å (A) and 40 Å (B) for BD42<sub>R</sub>.

A

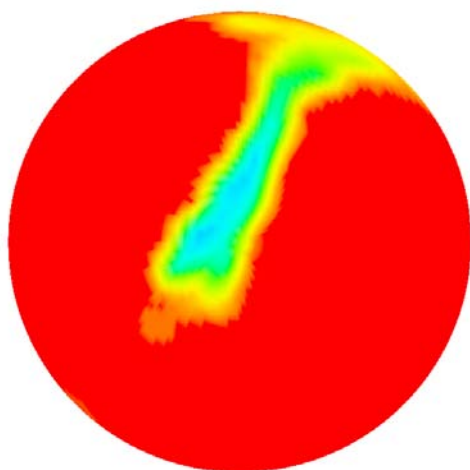

B

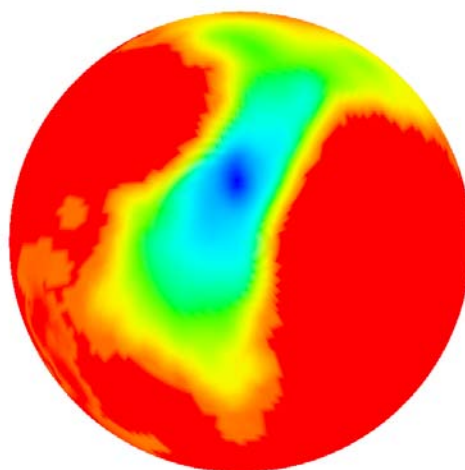

Figure S6. The free energy landscapes at 36 Å (A) and 40 Å (B) for BD42<sub>O</sub>.

A

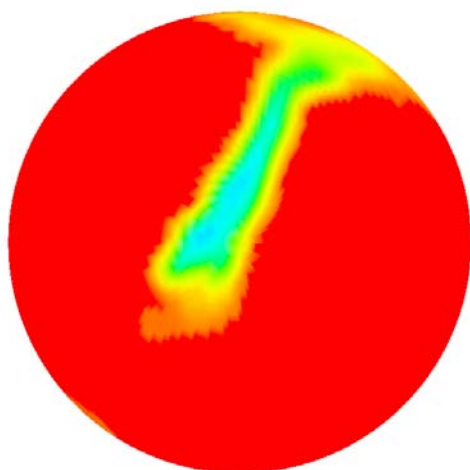

B

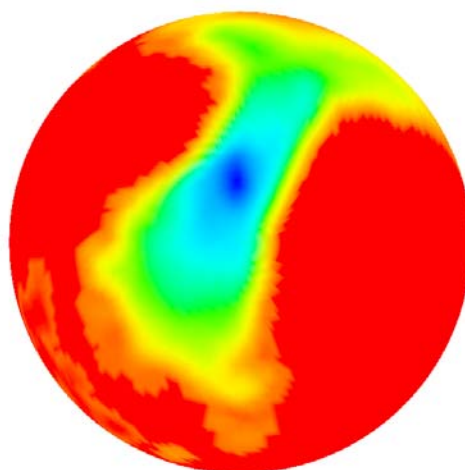

Supplement: 107.127548_1.pdf [file 107.127548_1.pdf]
